# Supplementary material for: Effect of correcting for gestational age at birth on population prevalence of early childhood undernutrition
Source: Springer Nature journal article supplement (doi:10.1186/s12982-018-0070-1), 2018-02-06
Supplement: MOESM1 [file 15443016]

**Effect of correcting for gestational age at birth on population prevalence of early childhood undernutrition**

Nandita Perumal, Daniel E. Roth, Johnna Perdrizet, Aluísio J D Barros, Iná S Santos, Alicia Matijasevich, Diego G Bassani

**ADDITIONAL SUPPORTING MATERIAL**

**Emerging Themes in Epidemiology**

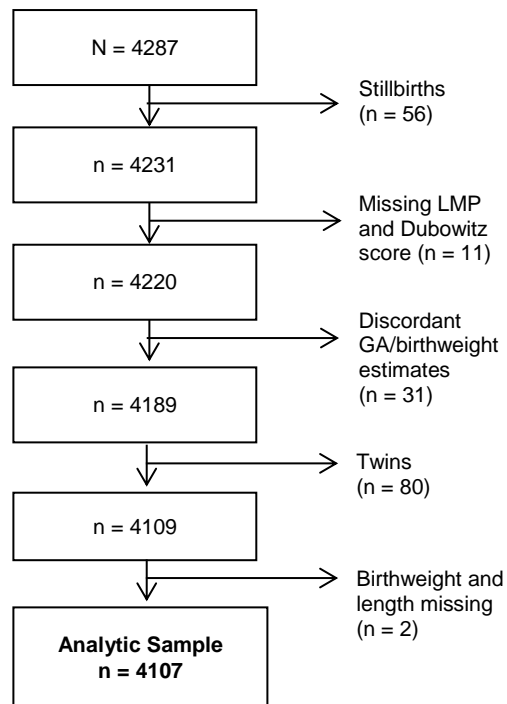

**Figure S1.** Flowchart of analytical sample for this study.

## Additional Supporting Information

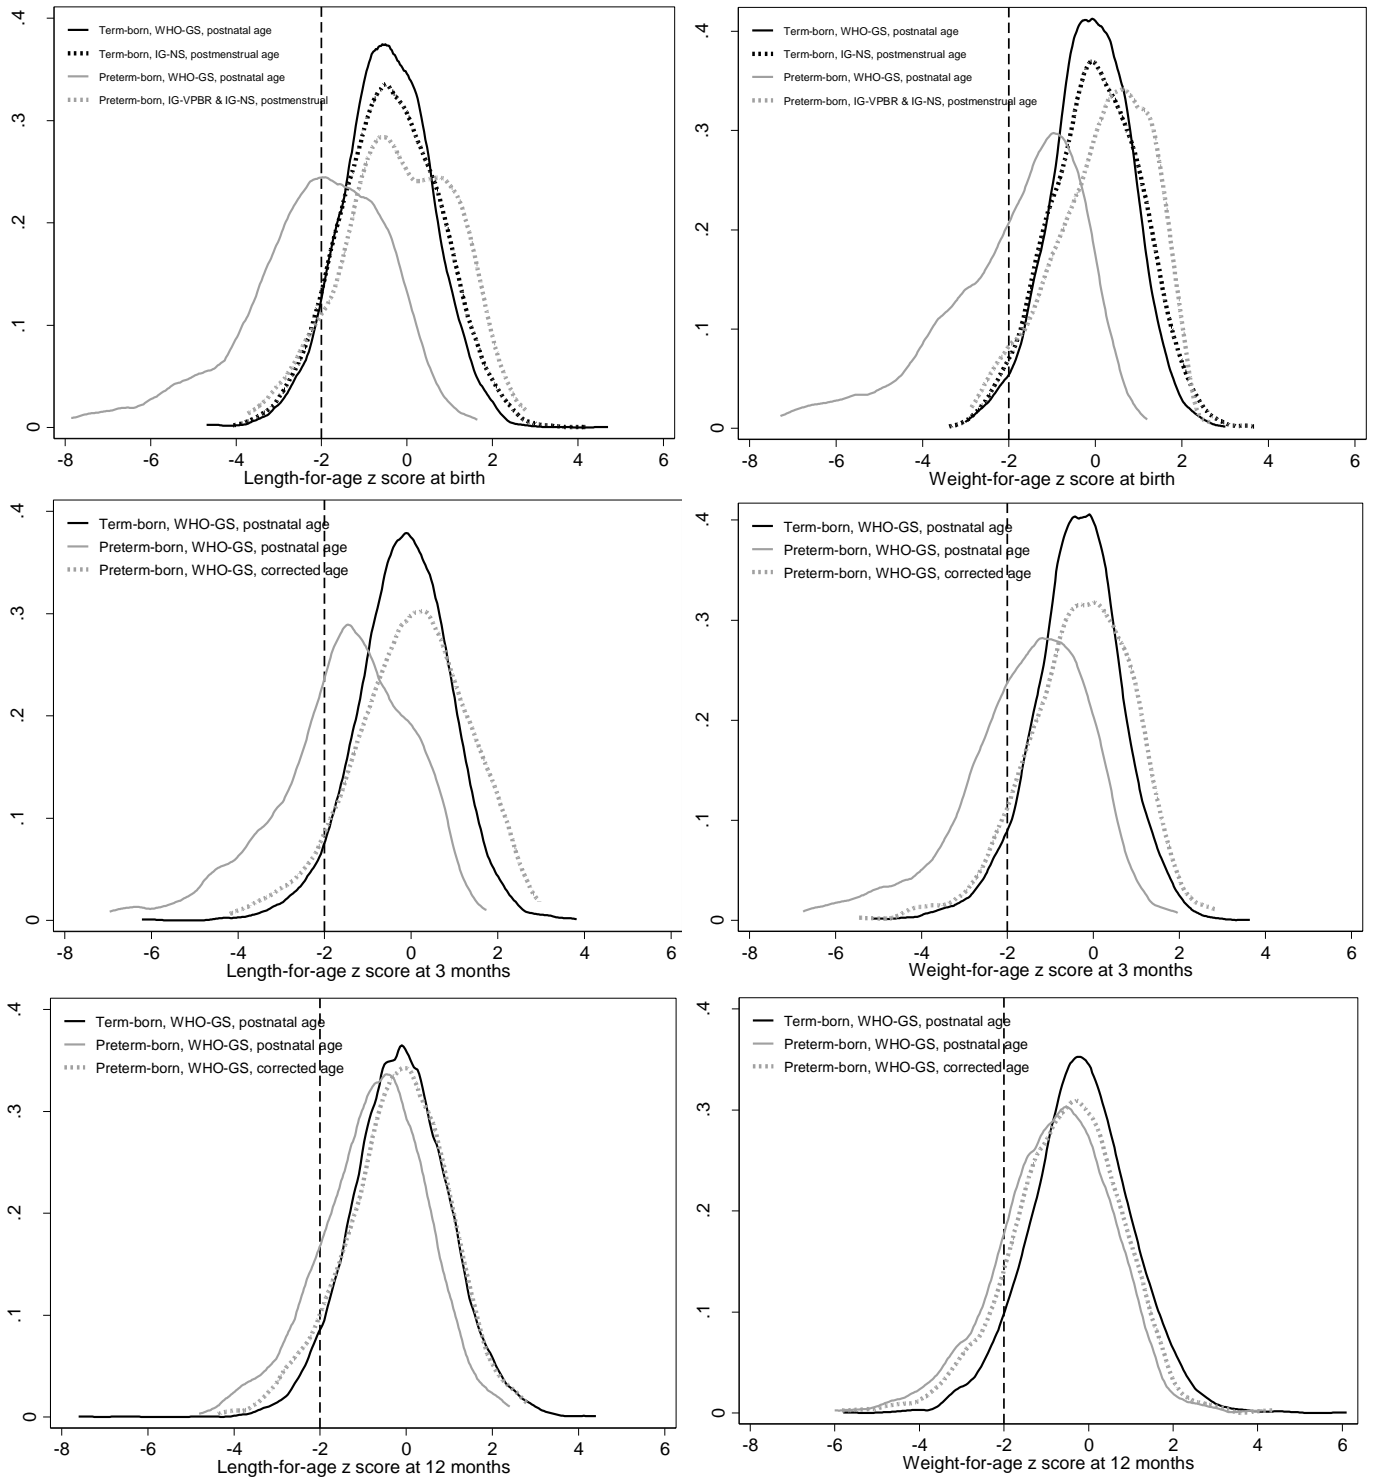

**Figure S2.** Comparison of the distribution of length-for-age and weight-for-age z scores at birth (top row), 3 months (middle row), and 12 months (bottom row) among preterm- and term-born children using postnatal age and gestational age-corrected age in the application of World Health Organization child growth standards (WHO-GS). At birth, the INTERGROWTH newborn size standards (IG-NS) and the INTERGROWTH very preterm born size at birth references (IG-VPBR) were applied for all children using postmenstrual age.

**Table S1.** Length-for-age z scores at postnatal follow-up visits estimated using either postnatal age or gestational age-corrected age in the application of the World Health Organization growth child growth standards for all children.

| Follow-up visit <sup>a</sup> | n    | Excluded n |                         | Flagged Obs <sup>b</sup> | Mean ± SD <sup>c</sup> | Median (1 <sup>st</sup> , 99 <sup>th</sup> ) | Term-born children (≥37 <sup>0/7</sup> wk) |               | Preterm-born children (<37 <sup>0/7</sup> wk) |               | Mean difference in LAZ among term vs preterm-born |                      |
|------------------------------|------|------------|-------------------------|--------------------------|------------------------|----------------------------------------------|--------------------------------------------|---------------|-----------------------------------------------|---------------|---------------------------------------------------|----------------------|
|                              |      | No data    | Ineligible for analysis |                          |                        |                                              | n                                          | Mean ± SD     | n                                             | Mean ± SD     | Mean difference (95% CI)                          | P value <sup>d</sup> |
| <b>3 mo<sup>e</sup></b>      |      |            |                         |                          |                        |                                              |                                            |               |                                               |               |                                                   |                      |
| WHO-GS, postnatal age all    | 3859 | 4          | 2                       | 10                       | -0.32 ± 1.23           | -0.24 (-4.11, 2.24)                          | 3444                                       | -0.17 ± 1.08  | 415                                           | -1.57 ± 1.61  | 1.41 (1.25, 1.57)                                 | <0.001               |
| WHO-GS, CA all               | 3859 | 4          | 2                       | 0                        | -0.03 ± 1.14           | 0.01 (-3.05, 2.46)                           | 3444                                       | -0.04 ± 1.12  | 415                                           | -0.002 ± 1.34 | -0.03 (-0.17, 0.10)                               | 0.618                |
| <b>12 mo</b>                 |      |            |                         |                          |                        |                                              |                                            |               |                                               |               |                                                   |                      |
| WHO-GS, postnatal age all    | 3801 | 3          | 0                       | 3                        | -0.20 ± 1.17           | -0.20 (-3.09, 2.55)                          | 3390                                       | -0.13 ± 1.15  | 411                                           | -0.76 ± 1.22  | 0.63 (0.50, 0.75)                                 | <0.001               |
| WHO-GS, CA all               | 3801 | 3          | 0                       | 3                        | -0.10 ± 1.16           | -0.10 (-2.84, 2.58)                          | 3390                                       | -0.09 ± 1.16  | 411                                           | -0.21 ± 1.19  | 0.12 (0.001, 0.25)                                | 0.048                |
| <b>24 mo</b>                 |      |            |                         |                          |                        |                                              |                                            |               |                                               |               |                                                   |                      |
| WHO-GS, postnatal age all    | 3739 | 9          | 0                       | 1                        | -0.10 ± 1.15           | -0.09 (-2.89, 2.56)                          | 3324                                       | -0.04 ± 1.13  | 415                                           | -0.55 ± 1.20  | 0.50 (0.39, 0.62)                                 | <0.001               |
| WHO-GS, CA all               | 3739 | 9          | 0                       | 1                        | -0.03 ± 1.15           | -0.02 (-2.82, 2.64)                          | 3324                                       | -0.004 ± 1.14 | 415                                           | -0.28 ± 1.20  | 0.28 (0.16, 0.41)                                 | <0.001               |
| <b>48 mo</b>                 |      |            |                         |                          |                        |                                              |                                            |               |                                               |               |                                                   |                      |
| WHO-GS, postnatal age all    | 3609 | 4          | 0                       | 1                        | -0.14 ± 1.08           | -0.14 (-2.69, 2.42)                          | 3214                                       | -0.11 ± 1.07  | 395                                           | -0.42 ± 1.11  | 0.31 (0.19, 0.42)                                 | <0.001               |
| WHO-GS, CA all               | 3609 | 4          | 0                       | 1                        | -0.11 ± 1.08           | -0.13 (-2.63, 2.43)                          | 3214                                       | -0.09 ± 1.07  | 395                                           | -0.27 ± 1.11  | 0.18 (0.06, 0.29)                                 | 0.003                |

CA, gestational age-corrected age; CBP, children born preterm; GA, gestational age; IG-NS, INTERGROWTH-21<sup>st</sup> newborn size standards; IG-VPBR, INTERGROWTH 21<sup>st</sup> very preterm size at birth references; SD, standard deviation; TBC, term-born children; WHO-GS, World Health Organization child growth standards

<sup>a</sup> Child postnatal age during follow-up visits ranged from: 3 months (± 1 month); 12 months (± 2 months); 24 months (± 2 months); 48 months (± 6 months)

<sup>b</sup> Length-for-age z scores <-6SD or >6SD were flagged as “biologically implausible” values by the World Health Organization child growth standards macro. These values were not excluded from summary estimates.

<sup>c</sup> P-values for difference in paired means at each visit estimated using paired sample t-test were p<0.001 at all follow-up visits.

<sup>d</sup> P-value for mean difference in length-for-age z scores among term versus preterm-born children was estimated using independent sample t-test with unequal variances.

<sup>e</sup> The WHO-GS could not be applied to two infants who had a corrected age of <0 at the 3-month visit and therefore were excluded from the ‘WHO-GS, postnatal age all’ strategy as well (inferences were unchanged when these two infants were included).

**Table S2.** Weight-for-age z scores at postnatal follow-up visits estimated using either postnatal age or gestational age-corrected age in the application of the World Health Organization growth child growth standards for all children.

| Follow-up visit <sup>a</sup> | n    | Excluded n |                         | Flagged Obs <sup>b</sup> | Mean ± SD <sup>c</sup> | Median (1 <sup>st</sup> , 99 <sup>th</sup> ) | Term-born children (≥37 <sup>0/7</sup> wk) |              | Preterm-born children (<37 <sup>0/7</sup> wk) |              | Mean difference in WAZ among term vs preterm-born |                      |
|------------------------------|------|------------|-------------------------|--------------------------|------------------------|----------------------------------------------|--------------------------------------------|--------------|-----------------------------------------------|--------------|---------------------------------------------------|----------------------|
|                              |      | No data    | Ineligible for analysis |                          |                        |                                              | n                                          | Mean ± SD    | n                                             | Mean ± SD    | Mean difference (95% CI)                          | P value <sup>d</sup> |
| <b>3 mo<sup>e</sup></b>      |      |            |                         |                          |                        |                                              |                                            |              |                                               |              |                                                   |                      |
| WHO-GS, postnatal age all    | 3855 | 8          | 2 <sup>f</sup>          | 6                        | -0.50 ± 1.16           | -0.40 (-3.97, 1.87)                          | 3441                                       | -0.38 ± 1.04 | 414                                           | -1.56 ± 1.49 | 1.19 (1.04, 1.34)                                 | <0.001               |
| WHO-GS, CA all               | 3855 | 8          | 2 <sup>f</sup>          | 0                        | -0.28 ± 1.08           | 0.24 (-3.23, 2.11)                           | 3441                                       | -0.28 ± 1.06 | 414                                           | -0.29 ± 1.23 | 0.02 (-0.09, 0.13)                                | 0.763                |
| <b>12 mo</b>                 |      |            |                         |                          |                        |                                              |                                            |              |                                               |              |                                                   |                      |
| WHO-GS, postnatal age all    | 3779 | 25         | 0                       | 1                        | -0.25 ± 1.23           | -0.24 (-3.27, 2.61)                          | 3368                                       | -0.18 ± 1.20 | 411                                           | -0.79 ± 1.35 | 0.61 (0.47, 0.74)                                 | <0.001               |
| WHO-GS, CA all               | 3779 | 25         | 0                       | 1                        | -0.20 ± 1.22           | -0.19 (-3.15, 2.72)                          | 3368                                       | -0.16 ± 1.21 | 411                                           | -0.54 ± 1.32 | 0.38 (0.26, 0.51)                                 | <0.001               |
| <b>24 mo</b>                 |      |            |                         |                          |                        |                                              |                                            |              |                                               |              |                                                   |                      |
| WHO-GS, postnatal age all    | 3734 | 14         | 0                       | 4                        | -0.11 ± 1.21           | -0.13 (-3.06, 2.86)                          | 3319                                       | -0.06 ± 1.19 | 415                                           | -0.57 ± 1.29 | 0.52 (0.39, 0.65)                                 | <0.001               |
| WHO-GS, CA all               | 3734 | 14         | 0                       | 4                        | -0.08 ± 1.21           | -0.10 (-2.98, 2.85)                          | 3319                                       | -0.04 ± 1.19 | 415                                           | -0.41 ± 1.29 | 0.37 (0.25, 0.49)                                 | <0.001               |
| <b>48 mo</b>                 |      |            |                         |                          |                        |                                              |                                            |              |                                               |              |                                                   |                      |
| WHO-GS, postnatal age all    | 3612 | 1          | 0                       | 11                       | 0.43 ± 1.26            | 0.30 (-2.22, 4.21)                           | 3216                                       | 0.47 ± 1.24  | 396                                           | 0.05 ± 1.28  | 0.42 (0.29, 0.55)                                 | <0.001               |
| WHO-GS, CA all               | 3612 | 1          | 0                       | 13                       | 0.44 ± 1.26            | 0.32 (-2.20, 4.25)                           | 3216                                       | 0.48 ± 1.25  | 396                                           | 0.14 ± 1.29  | 0.34 (0.21, 0.47)                                 | <0.001               |

CA, gestational age-corrected age; CBP, children born preterm; GA, gestational age; IG-NS, INTERGROWTH-21<sup>st</sup> newborn size standards; IG-VPBR, INTERGROWTH 21<sup>st</sup> very preterm size at birth references; SD, standard deviation; TBC, term-born children; WHO-GS, World Health Organization child growth standards

<sup>a</sup> Child postnatal age during follow-up visits ranged from: 3 months (± 1 month); 12 months (± 2 months); 24 months (± 2 months); 48 months (± 6 months)

<sup>b</sup> Weight-for-age z scores <-6SD or >6SD were flagged as “biologically implausible” values by the World Health Organization child growth standards macro. These values were not excluded from summary estimates.

<sup>c</sup> P-values for difference in paired means at each visit estimated using paired sample t-test were p<0.001 at all follow-up visits.

<sup>d</sup> P-value for mean difference in length-for-age z scores among term versus preterm-born children was estimated using independent sample t-test with unequal variances.

<sup>e</sup> The WHO-GS could not be applied to two infants who had a corrected age of <0 at the 3-month visit and therefore were excluded from the ‘WHO-GS, postnatal age all’ strategy as well (inferences were unchanged when these two infants were included).

**Table S3.** Length/weight-for-age z scores at the 3-month visit estimated using postnatal age in the application of the World Health Organization child growth standards for all children (WHO-GS), or accounting for gestational age using the INTERGROWTH 21<sup>st</sup> postnatal standards for preterm born children in conjunction with WHO-GS for term-born children.

| Anthropometric indices at 3 months                                  | n    | Mean (SD) <sup>a</sup> | Median<br>(1 <sup>st</sup> , 99 <sup>th</sup> ) | Term-born children<br>(≥37 <sup>0/7</sup> wks) |              | Preterm-born children<br>(<37 <sup>0/7</sup> wks) |              | P value <sup>b</sup> |
|---------------------------------------------------------------------|------|------------------------|-------------------------------------------------|------------------------------------------------|--------------|---------------------------------------------------|--------------|----------------------|
|                                                                     |      |                        |                                                 | n                                              | Mean ± SD    | n                                                 | Mean ± SD    |                      |
| <b>Length-for-age z-score</b>                                       |      |                        |                                                 |                                                |              |                                                   |              |                      |
| WHO-GS, postnatal age all                                           | 3861 | -0.32 (1.24)           | -0.24 (-4.11, 2.24)                             | 3444                                           | -0.17 (1.08) | 417                                               | -1.59 (1.63) | <0.001               |
| IG-PPFS, postmenstrual age for CBP;<br>WHO-GS postnatal age for TBC | 3861 | -0.11 (1.14)           | -0.09 (-3.10, 2.45)                             | 3444                                           | -0.17 (1.08) | 417                                               | 0.34 (1.43)  | <0.001               |
| <b>Weight-for-age z-score</b>                                       |      |                        |                                                 |                                                |              |                                                   |              |                      |
| WHO-GS, postnatal age all                                           | 3857 | -0.51 (1.16)           | -0.40 (-4.01, 1.87)                             | 3441                                           | -0.38 (1.04) | 416                                               | -1.58 (1.50) | <0.001               |
| IG-PPFS, postmenstrual age for CBP;<br>WHO-GS postnatal age for TBC | 3857 | -0.32 (1.08)           | -0.27 (-3.29, 2.05)                             | 3441                                           | -0.38 (1.04) | 416                                               | 0.16 (1.26)  | <0.001               |

<sup>a</sup> P-value for difference in paired means (ref: WHO-GS, postnatal age all) estimated using paired t-test were p<0.001.

<sup>b</sup> P-value for mean difference among term versus preterm-born children using independent sample t-test with unequal variances.

CBP, children born preterm; IG-PPFS, INTERGROWTH 21st postnatal standards for preterm born children; SD, standard deviation; TBC, term-born children; WHO-GS, World Health Organization Child Growth Standards

**Table S4.** Prevalence, odds of stunting (length-for-age  $z$  score  $<-2$ ) and underweight (weight-for-age  $z$  scores  $<-2$ ) among preterm compared to term-born children, and the population attributable risk of stunting due to preterm birth, estimated using postnatal or postmenstrual age at 3 months in the 2004 Pelotas Birth Cohort.

| Anthropometric indices at 3 months                                  | n    | Overall undernourished <sup>a</sup> |                      | Term-born children ( $\geq 37^{0/7}$ wks) |                      | Preterm-born children ( $< 37^{0/7}$ wks) |                      | Odds of undernutrition among preterm vs term-born children | % PAR <sup>c</sup> |
|---------------------------------------------------------------------|------|-------------------------------------|----------------------|-------------------------------------------|----------------------|-------------------------------------------|----------------------|------------------------------------------------------------|--------------------|
|                                                                     |      | n (%)                               | P value <sup>b</sup> | n                                         | Undernourished n (%) | n                                         | Undernourished n (%) | OR (95% CI)                                                |                    |
| <b>Length-for-age z-score</b>                                       |      |                                     |                      |                                           |                      |                                           |                      |                                                            |                    |
| WHO-GS, postnatal age all                                           | 3861 | 301 (7.80)                          | <0.001               | 3444                                      | 166 (4.82)           | 417                                       | 135 (32.4)           | 9.45 (7.31, 12.23)                                         | 38.2               |
| IG-PPFS, postmenstrual age for CBP;<br>WHO-GS postnatal age for TBC | 3861 | 190 (4.92)                          |                      | 3444                                      | 166 (4.82)           | 417                                       | 24 (5.76)            | 1.21 (0.78, 1.87)                                          | 2.05               |
| <b>Weight-for-age z-score</b>                                       |      |                                     |                      |                                           |                      |                                           |                      |                                                            |                    |
| WHO-GS, postnatal age all                                           | 3857 | 361 (9.36)                          | <0.001               | 3441                                      | 220 (6.39)           | 416                                       | 141 (33.9)           | 7.51 (5.89, 9.59)                                          | 31.7               |
| IG-PPFS, postmenstrual age for CBP;<br>WHO-GS postnatal age for TBC | 3857 | 240 (6.22)                          |                      | 3441                                      | 220 (6.39)           | 416                                       | 20 (4.81)            | 0.74 (0.47, 1.18)                                          | -2.75              |

<sup>a</sup>Children with length-for-age  $z$ -scores  $<-2$  SD (stunted) and/or weight-for-age  $z$ -scores  $<-2$  SD (underweight) are collectively referred to as 'undernourished'.

<sup>b</sup>P-values from McNemar's test for difference in paired proportions (ref: WHO-GS, postnatal age all) were  $p < 0.001$ .

<sup>c</sup>Proportion undernourished in the population due to preterm birth.

CA, gestational age-corrected age; CBP, children born preterm; CI, confidence interval; GA, gestational age; IG-NS, INTERGROWTH 21<sup>st</sup> newborn size standards; IG-PPFS, INTERGROWTH 21<sup>st</sup> postnatal standards for preterm born children; OR, odds ratio; PAR, population attributable risk; TBC, term-born children; WHO-GS, World Health Organization child growth standards

**Table S5.** Prevalence, unadjusted odds of wasting (weight-for-length z score <-2) among children born preterm compared to term-born children using the World Health Organization child growth standards, and the population attributable risk of wasting due to preterm birth from birth to the 48-month follow-up visit in the 2004 Pelotas Birth Cohort.

| Follow-up visit <sup>a</sup> | n    | Overall wasted n (%) | Term-born children (≥37 <sup>0/7</sup> wks) |              | Preterm-born children (<37 <sup>0/7</sup> wks) |              | Odds of undernutrition among preterm vs term-born children |         | % PAR <sup>b</sup> |
|------------------------------|------|----------------------|---------------------------------------------|--------------|------------------------------------------------|--------------|------------------------------------------------------------|---------|--------------------|
|                              |      |                      | n                                           | Wasted n (%) | n                                              | Wasted n (%) | OR (95% CI)                                                | P value |                    |
| <b>Birth</b>                 | 3764 | 44 (1.17)            | 3479                                        | 34 (0.98)    | 285                                            | 10 (3.51)    | 3.68 (1.80, 7.54)                                          | <0.001  | 16.4               |
| <b>3 mo</b>                  | 3856 | 193 (5.01)           | 3441                                        | 165 (4.80)   | 415                                            | 28 (6.75)    | 1.44 (0.95, 2.17)                                          | 0.087   | 4.20               |
| <b>12 mo</b>                 | 3777 | 275 (7.28)           | 3366                                        | 228 (6.77)   | 411                                            | 47 (11.4)    | 1.78 (1.27, 2.48)                                          | 0.001   | 6.97               |
| <b>24 mo</b>                 | 3726 | 195 (5.23)           | 3312                                        | 159 (4.80)   | 414                                            | 36 (8.70)    | 1.89 (1.30, 2.75)                                          | 0.001   | 8.27               |
| <b>48 mo</b>                 | 3606 | 19 (0.53)            | 3211                                        | 12 (0.37)    | 395                                            | 7 (1.77)     | 4.81 (1.88, 12.29)                                         | 0.001   | 29.1               |

<sup>a</sup> Child postnatal age during follow-up visits ranged from: 3 months (± 1 month); 12 months (± 2 months); 24 months (±2 months); 48 months (± 6 months)

<sup>b</sup> Proportion of all wasting in the population that is attributable to preterm births.  
CI, confidence interval; OR, odds ratio; PAR, population attributable risk.
